# Supplementary material for: Toxicological investigation of mycotoxin contaminants and antibiotic residues associated with the poultry industry and their impact on human health
Source: Royal Society of Chemistry journal article supplement (doi:10.1039/d6ra00856a), 2026-05-05
Supplement: d6ra00856a1.pdf [file d6ra00856a1.pdf]

## Supporting Information

### Toxicological investigation of mycotoxin contaminants and antibiotic residues associated with the poultry industry and their impact on human health

Jahida Akter <sup>a,b</sup>, Kabir Hossain <sup>a,c</sup>, Santanu Deb Nath <sup>a,d</sup>, Hozzatul Islam <sup>a,c</sup>, Khaleda Afrin <sup>a,e</sup>,  
Hamida Begum <sup>a,f</sup>, Monir Uzzaman <sup>a,e\*</sup>

<sup>a</sup> Department of Toxicology Research, Computer in Chemistry and Medicine Laboratory, Dhaka, Bangladesh

<sup>b</sup> Department of Textile Engineering, Port City International University, Chittagong, Bangladesh

<sup>c</sup> Faculty of Science, Department of Applied Chemistry and Chemical Engineering, University of Chittagong, Chittagong, 4331, Bangladesh

<sup>d</sup> Faculty of Biological Sciences, Department of Biochemistry and Molecular Biology, Noakhali Science and Technology University, Noakhali-3814, Chittagong, Bangladesh

<sup>e</sup> Faculty of Science, Department of Chemistry, University of Chittagong, Chittagong, 4331, Bangladesh

<sup>f</sup> National Drug Control Laboratory, Dhaka, Bangladesh

\*Correspondence: [monircu92@gmail.com](mailto:monircu92@gmail.com)

## Table of Contents

|                                               |      |
|-----------------------------------------------|------|
| 1. Structural details of all compounds        | S-2  |
| 2. Frontier molecular orbital analysis        | S-3  |
| 3. Graphical presentation of HOMO-LUMO energy | S-4  |
| 4. Figure of DOS                              | S-5  |
| 5. Illustration of the active site selection  | S-5  |
| 6. Figure of Ramachandran plot                | S-7  |
| 7. Figure of MEP, FT-IR, and UV               | S-8  |
| 8. Vibrational frequencies data               | S-8  |
| 9. Electronic absorption data                 | S-10 |
| 10. Figure of docked conformers               | S-10 |
| 11. Table of non-bonded interactions          | S-13 |
| 12. Figure of MD simulation                   | S-16 |
| 13. Table of QSAR                             | S-19 |
| 14. References                                | S-20 |

**Table S1** Molecular formula (MF), molecular weight (MW), and enthalpy of all compounds.

| Name | MF                                                             | MW<br>(g/mol) | Enthalpy<br>(Hartree) |
|------|----------------------------------------------------------------|---------------|-----------------------|
| ZER  | C <sub>18</sub> H <sub>22</sub> O <sub>5</sub>                 | 318.40        | -1074.94              |
| AB1  | C <sub>17</sub> H <sub>12</sub> O <sub>6</sub>                 | 312.27        | -1106.09              |
| CIP  | C <sub>17</sub> H <sub>18</sub> FN <sub>3</sub> O <sub>3</sub> | 331.34        | -1148.05              |
| ENR  | C <sub>19</sub> H <sub>22</sub> FN <sub>3</sub> O <sub>3</sub> | 359.40        | -1226.62              |
| OXY  | C <sub>22</sub> H <sub>24</sub> N <sub>2</sub> O <sub>9</sub>  | 496.50        | -1638.84              |
| OTA  | C <sub>20</sub> H <sub>18</sub> ClNO <sub>6</sub>              | 403.80        | -1738.97              |

**Table S2** Energy (eV) of HOMO, LUMO, gap, hardness ( $\eta$ ), softness ( $S$ ), chemical potential ( $\mu$ ), electronegativity ( $\chi$ ), and electrophilicity ( $\omega$ ) of all toxic compounds.

| Name | HOMO  | LUMO  | Gap  | $\eta$ | $S$  | $\mu$ | $\chi$ | $\omega$ |
|------|-------|-------|------|--------|------|-------|--------|----------|
| ZER  | -5.88 | -1.25 | 4.63 | 2.32   | 0.22 | -3.57 | 3.57   | 2.75     |
| AB1  | -6.09 | -1.99 | 4.10 | 2.05   | 0.24 | -4.04 | 4.04   | 3.98     |
| CIP  | -5.69 | -1.20 | 4.49 | 2.25   | 0.22 | -3.45 | 3.45   | 2.65     |
| ENR  | -5.69 | -1.20 | 4.49 | 2.25   | 0.22 | -3.45 | 3.45   | 2.65     |
| OXY  | -5.90 | -1.80 | 4.10 | 2.05   | 0.24 | -3.85 | 3.85   | 3.61     |
| OTA  | -6.39 | -1.88 | 4.51 | 2.26   | 0.22 | -4.12 | 4.12   | 3.79     |

**Table S3** Different convergence parameters of all selected compounds.

| Name | Maximum Force<br>(meV/Å) | TL<br>(meV/Å) | RMS Force<br>(meV/Å) | TL<br>(meV/Å) | MD<br>(mÅ) | TL<br>(mÅ) | RD<br>(mÅ) | TL<br>(mÅ) |
|------|--------------------------|---------------|----------------------|---------------|------------|------------|------------|------------|
| ZER  | 0.72                     | 23.14         | 0.21                 | 15.43         | 0.30       | 0.95       | 0.08       | 0.63       |
| AB1  | 0.62                     |               | 0.10                 |               | 0.49       |            | 0.09       |            |
| CIP  | 1.13                     |               | 0.21                 |               | 0.52       |            | 0.12       |            |
| ENR  | 0.36                     |               | 0.10                 |               | 0.64       |            | 0.11       |            |
| OXY  | 2.32                     |               | 0.46                 |               | 0.88       |            | 0.17       |            |
| OTA  | 0.87                     |               | 0.15                 |               | 0.89       |            | 0.21       |            |

Threshold limit (TL), Maximum displacement (MD), RMS displacement (RD)

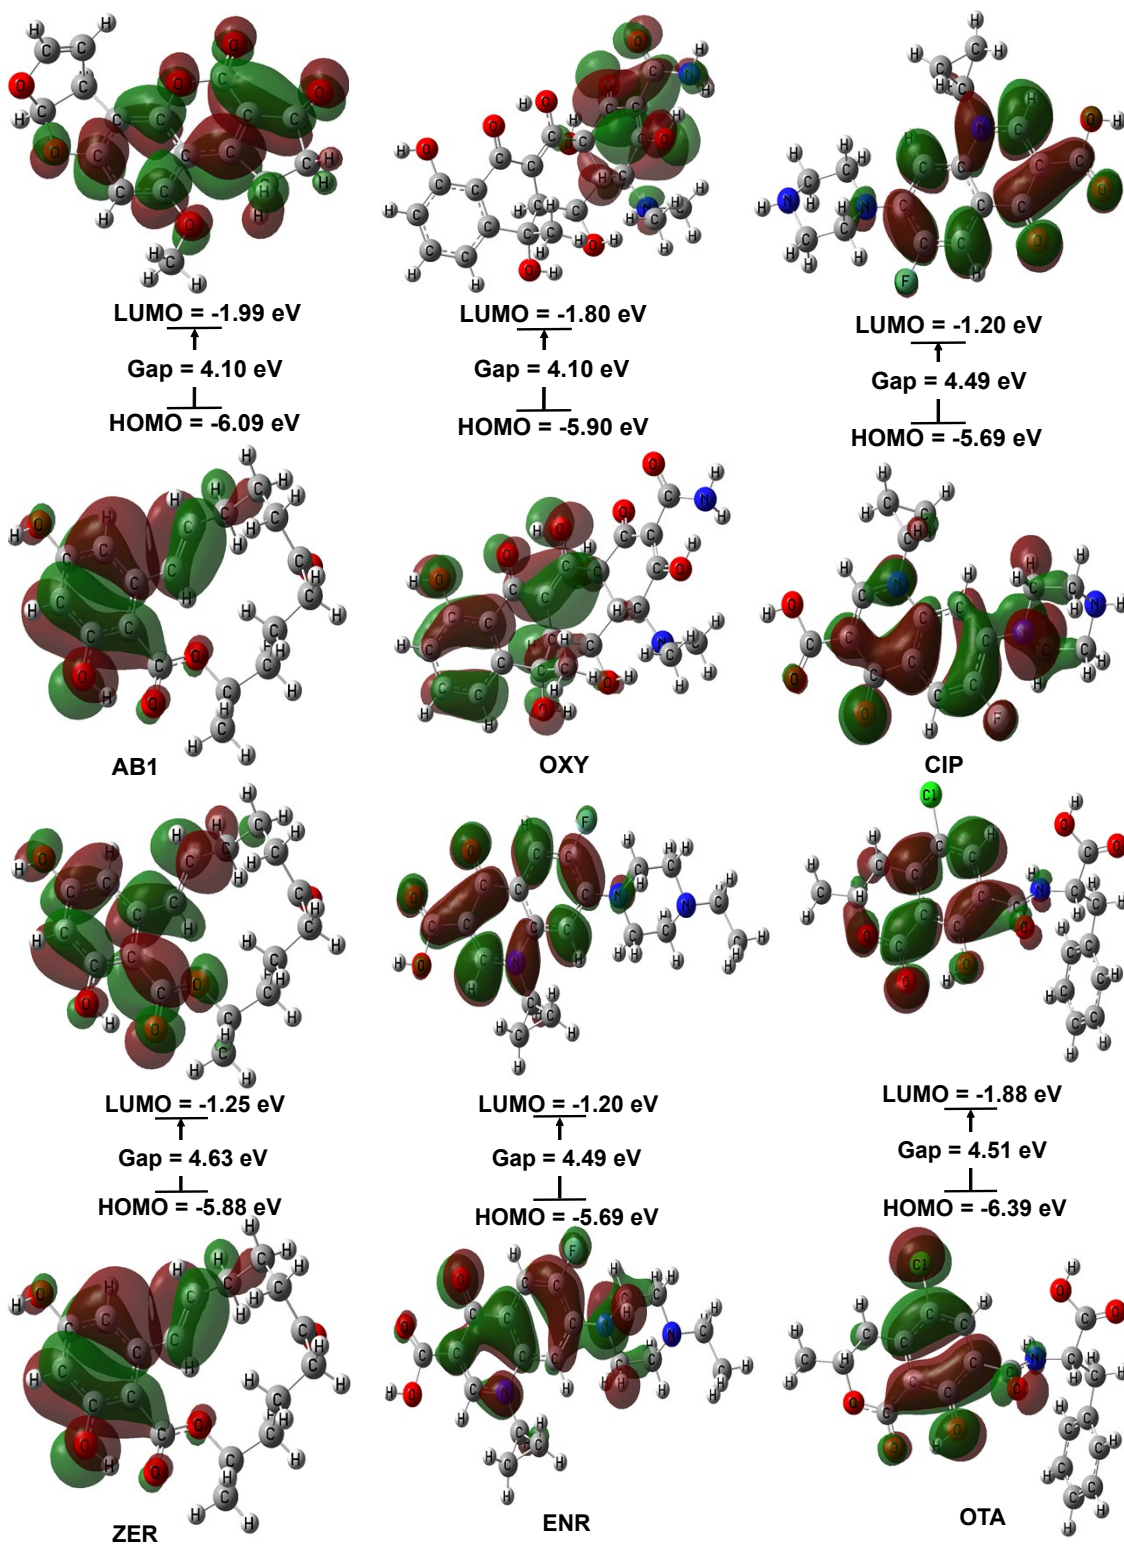

**Fig. S1** Molecular orbital distribution of HOMO and LUMO energy states in the ground state of all compounds.

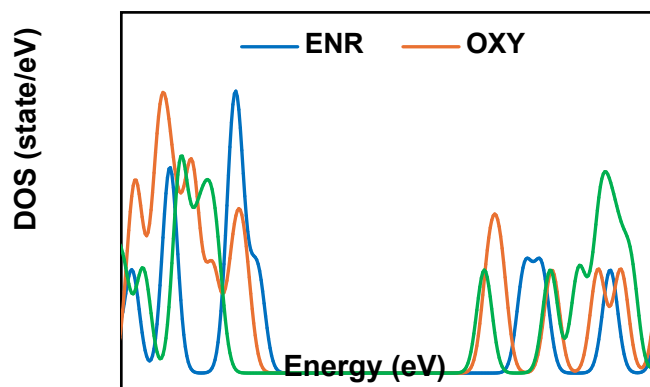

**Fig. S2** DOS of ENR, OXY, and OTA (remaining compounds).

### 1.0. Active site selection

The selection of the active site was conducted using the 3D structure of selected proteins with the P2Rank binding pocket prediction algorithm, which helped to analyze the protein's surface geometry. Pocket 1 was identified as the most probable active site <sup>1</sup>. The probability was 0.95 and 0.98, indicating a true binding site for the 4G1C and 3P0M proteins, respectively, while the probability of the 2RJQ protein was 0.71. The number of residues was 17 (for 2RGQ), 37 (for 4G1C), and 31 (for 3P0M), suggesting a well-defined pocket, with these residues forming a deep cavity. The decent conservation scores were 2.20 (for 2RJQ), 2.01 (for 4G1C), and 2.65 (for 3P0M), supporting its functional relevance as a ligand-binding region. The identified active site region was visualized in red on the protein surface, representing the most probable ligand-binding cavity, illustrated in **Fig. S3**.

### 2.0. Docking validation

The stereochemical quality of the selected protein was evaluated using the Ramachandran plot, which was generated by PROCHECK <sup>2</sup>. The results showed that 88.8% of residues were in the most favored regions, 10.4% in additional allowed regions, and only 0.4% in disallowed regions for the 2RJQ protein. While 91.0% residues were in the most favored regions, 8.5% in additional allowed regions, and no residues were available in disallowed regions for the 4G1C protein. Furthermore, 91.9% of residues were in the most favored regions, 8.1% in additional allowed regions, and no residues were available in disallowed regions

for the 3P0M protein, illustrated in **Fig. S4(a)**, **(b)**, and **(c)**, respectively. Since a good-quality protein structure is expected to have >90% residues in the most favored regions and <1% in disallowed regions, the structure can be considered reliable for subsequent molecular docking and MD simulation studies<sup>3</sup>.

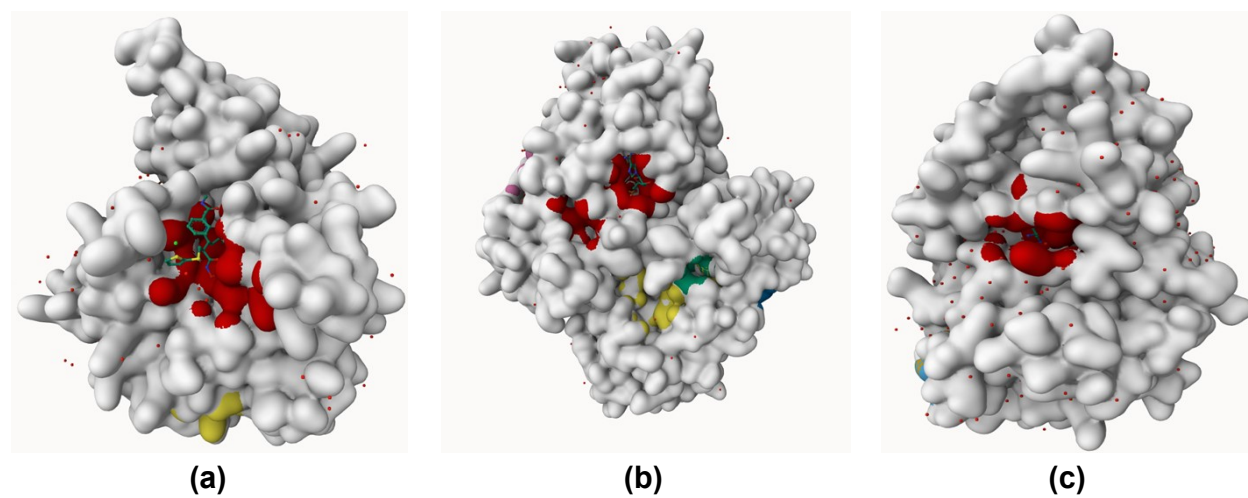

**Fig. S3** Predicted active site of **(a)** 2RJQ, **(b)** 4G1C, and **(c)** 3P0M proteins showing the top-ranked binding pocket (in red) identified by structure-based pocket prediction.

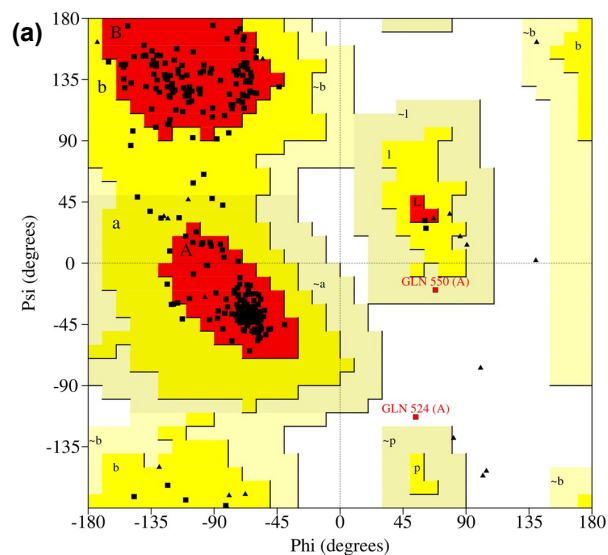

#### Plot statistics

|                                                      |     |        |
|------------------------------------------------------|-----|--------|
| Residues in most favoured regions [A,B,L]            | 230 | 88.8%  |
| Residues in additional allowed regions [a,b,l,p]     | 27  | 10.4%  |
| Residues in generously allowed regions [-a,-b,-l,-p] | 1   | 0.4%   |
| Residues in disallowed regions                       | 1   | 0.4%   |
| -----                                                |     |        |
| Number of non-glycine and non-proline residues       | 259 | 100.0% |
| Number of end-residues (excl. Gly and Pro)           | 3   |        |
| Number of glycine residues (shown as triangles)      | 22  |        |
| Number of proline residues                           | 9   |        |
| -----                                                |     |        |
| Total number of residues                             | 293 |        |

Based on an analysis of 118 structures of resolution of at least 2.0 Angstroms and R-factor no greater than 20%, a good quality model would be expected to have over 90% in the most favoured regions.

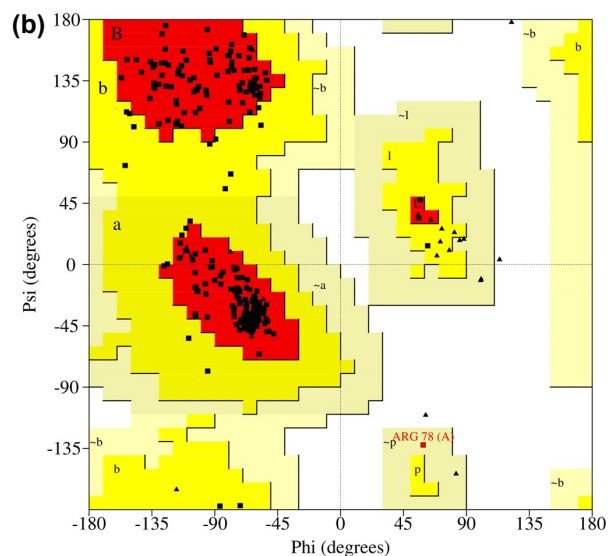

#### Plot statistics

|                                                      |     |        |
|------------------------------------------------------|-----|--------|
| Residues in most favoured regions [A,B,L]            | 203 | 91.0%  |
| Residues in additional allowed regions [a,b,l,p]     | 19  | 8.5%   |
| Residues in generously allowed regions [-a,-b,-l,-p] | 1   | 0.4%   |
| Residues in disallowed regions                       | 0   | 0.0%   |
| -----                                                |     |        |
| Number of non-glycine and non-proline residues       | 223 | 100.0% |
| Number of end-residues (excl. Gly and Pro)           | 2   |        |
| Number of glycine residues (shown as triangles)      | 24  |        |
| Number of proline residues                           | 19  |        |
| -----                                                |     |        |
| Total number of residues                             | 268 |        |

Based on an analysis of 118 structures of resolution of at least 2.0 Angstroms and R-factor no greater than 20%, a good quality model would be expected to have over 90% in the most favoured regions.

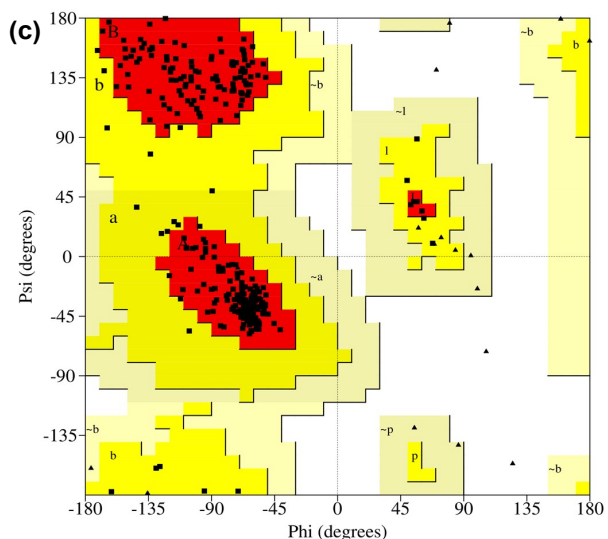

#### Plot statistics

|                                                      |     |        |
|------------------------------------------------------|-----|--------|
| Residues in most favoured regions [A,B,L]            | 271 | 91.9%  |
| Residues in additional allowed regions [a,b,l,p]     | 24  | 8.1%   |
| Residues in generously allowed regions [-a,-b,-l,-p] | 0   | 0.0%   |
| Residues in disallowed regions                       | 0   | 0.0%   |
| -----                                                |     |        |
| Number of non-glycine and non-proline residues       | 295 | 100.0% |
| Number of end-residues (excl. Gly and Pro)           | 7   |        |
| Number of glycine residues (shown as triangles)      | 20  |        |
| Number of proline residues                           | 14  |        |
| -----                                                |     |        |
| Total number of residues                             | 336 |        |

Based on an analysis of 118 structures of resolution of at least 2.0 Angstroms and R-factor no greater than 20%, a good quality model would be expected to have over 90% in the most favoured regions.

**Fig. S4** Ramachandran plot of the (a) 2RJQ, (b) 4G1C, and (c) 3P0M generated by PROCHECK.

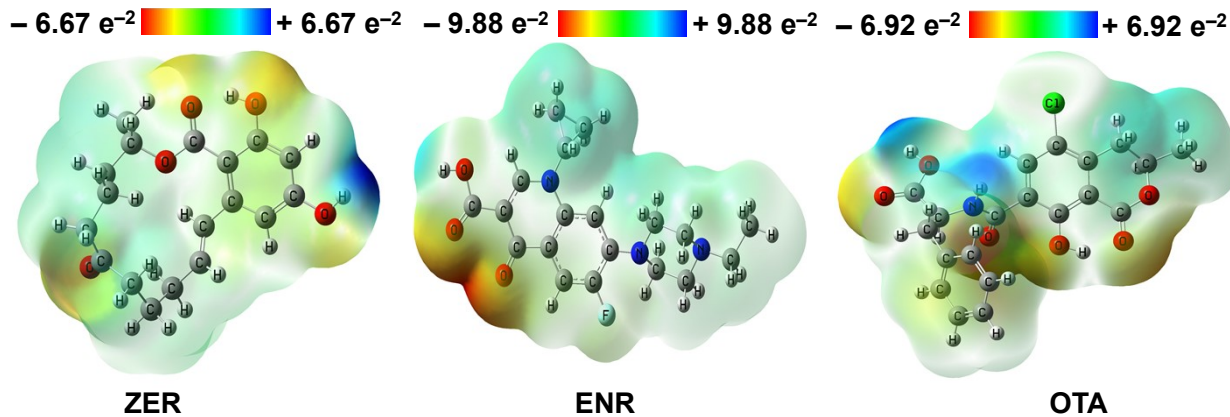

Fig. S5 Molecular electrostatic potential (MEP) map of selected compounds.

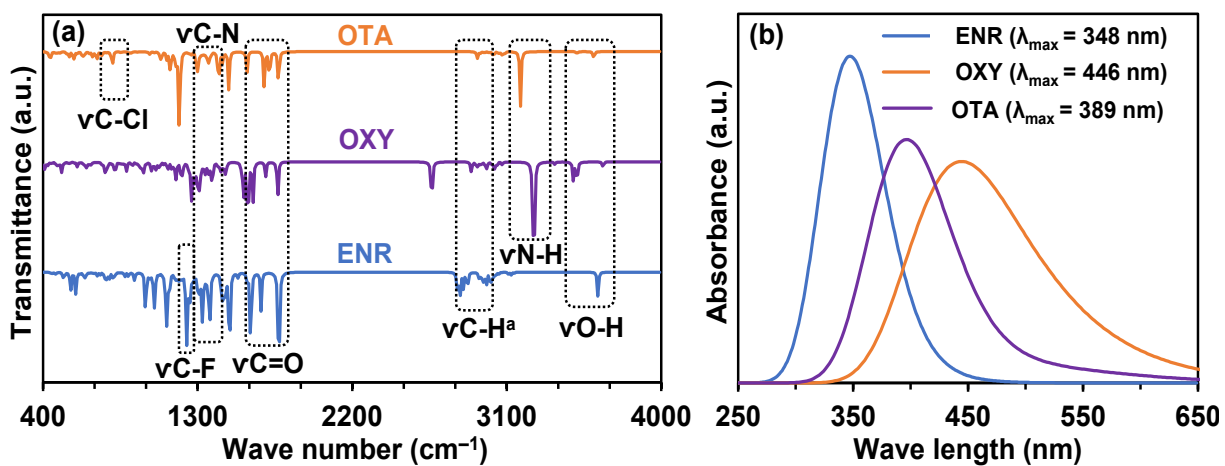

Fig. S6 (a) FT-IR and (b) UV-visible spectra of selected compounds.

Table S4 Vibrational frequencies of all compounds.

| Compounds | Assignment                  | Frequency (scaled, $\text{cm}^{-1}$ ) | Frequency (experimental, $\text{cm}^{-1}$ ) |
|-----------|-----------------------------|---------------------------------------|---------------------------------------------|
| ZER       | $\nu\text{C}=\text{O}^s$    | 1729                                  | 1715-1720                                   |
|           | $\nu\text{C}-\text{H}^s$    | 2900                                  | --                                          |
|           | $\nu\text{C}-\text{H}^{as}$ | 2974-3017                             | --                                          |
|           | $\nu\text{C}-\text{C}^a$    | 1572-1598                             | 1580-1590                                   |
|           | $\nu\text{O}-\text{H}^s$    | 3133-3673                             | --                                          |
| OTA       | $\nu\text{C}=\text{O}^s$    | 1729-1810                             | 1706                                        |
|           | $\nu\text{C}-\text{H}^s$    | 2919                                  | --                                          |

|                   |                    |           |           |
|-------------------|--------------------|-----------|-----------|
| AB1               | vC-H <sup>as</sup> | 2956-3136 | 2853-2925 |
|                   | vC-C <sup>a</sup>  | 1541-1634 | --        |
| <hr/>             |                    |           |           |
| CIP               | vC-C <sup>a</sup>  | 1609      | --        |
|                   | vC-N <sup>a</sup>  | 1329      | --        |
|                   | vC-N               | 1260      | --        |
|                   | vC=O               | 1669-1772 | 1700-1750 |
|                   | vC-H <sup>as</sup> | 2964-3142 | 2950-3000 |
|                   | vO-H               | 3630      | 3450-3500 |
|                   | vN-H               | 3397      | --        |
|                   | vC-F <sup>a</sup>  | 1240      | --        |
| <hr/>             |                    |           |           |
| ENR               | vC-N <sup>a</sup>  | 1329      | --        |
|                   | vC=O <sup>s</sup>  | 1669-1772 | 1737      |
|                   | vC-H <sup>as</sup> | 3004      | --        |
|                   | vC-H <sup>s</sup>  | 2810-2937 | --        |
|                   | vC-H <sup>a</sup>  | 3110      | --        |
|                   | vO-H <sup>s</sup>  | 3631      | 3300-3500 |
|                   | vC-F               | 1237      | --        |
|                   | vN-H <sup>s</sup>  | 3377      | --        |
| <hr/>             |                    |           |           |
| OXY               | vO-H               | 3488-3661 | --        |
|                   | vC=O               | 1695-1765 | 1621      |
|                   | vC-N <sup>a</sup>  | 1317      | 1218      |
|                   | vC-H <sup>s</sup>  | 2925      | --        |
|                   | vC-H <sup>as</sup> | 2985      | --        |
|                   | vO-H               | 3608      | 3380      |
| <hr/>             |                    |           |           |
| OTA               | vN-H               | 3509      | --        |
|                   | vO-H               | 3180      | --        |
|                   | vC-H <sup>as</sup> | 3076-3088 | --        |
|                   | vC-H <sup>s</sup>  | 2915-2970 | 2988      |
|                   | vC-Cl              | 713       | --        |
|                   | vC=O               | 1687-1771 | 1723      |
| vC-N <sup>a</sup> | 1242               | 1140      |           |

s = stretching, as = asymmetric, a = aromatic

**Table S5** Electronic transition data of all compounds.

| Name | Wavelength (nm) | Excited energy (eV) | Configuration composition (%) | Oscillator strength |
|------|-----------------|---------------------|-------------------------------|---------------------|
| AB1  | 315.23          | 3.93                | H-3→L (75.46)                 | 0.0721              |
| CIP  | 347.48          | 3.57                | H→L (86.21)                   | 0.1012              |
| ENR  | 347.97          | 3.56                | H→L (80.96)                   | 0.1022              |
| OTA  | 396.10          | 3.13                | H-1→L (96.27)                 | 0.0810              |
| OXY  | 431.49          | 2.87                | H-1→L (63.49)                 | 0.0047              |
| ZER  | 325.96          | 3.80                | H→L (90.05)                   | 0.0952              |

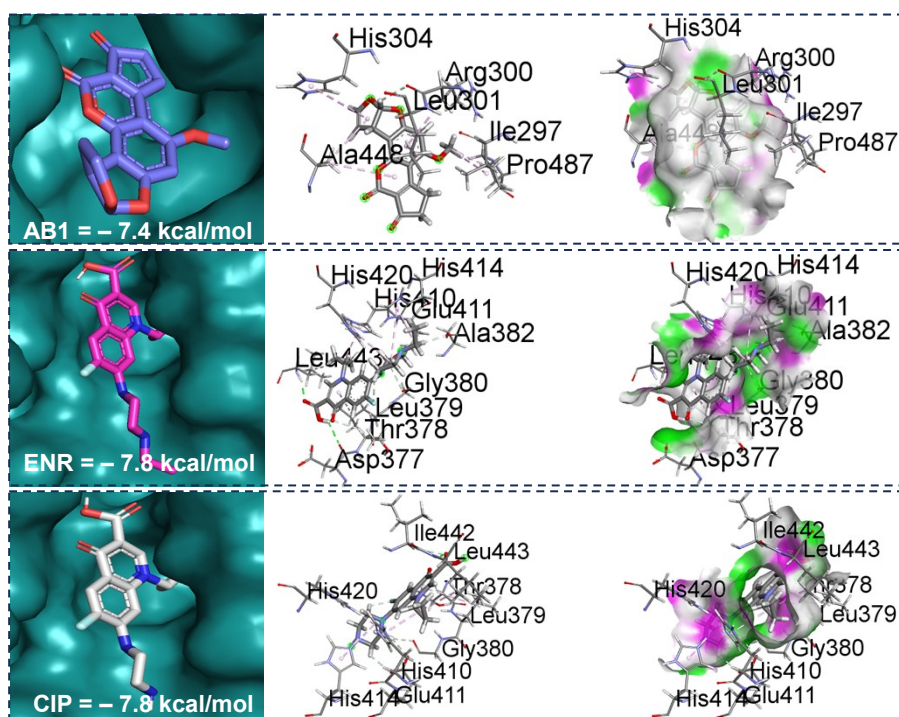

**(a)** PDB ID: 2RJQ

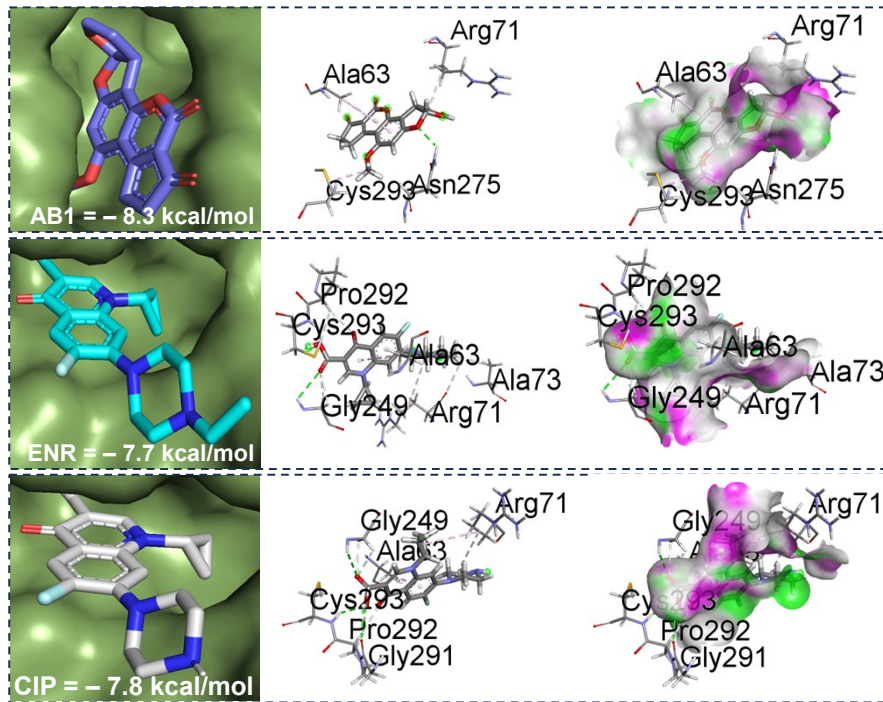

(b) PDB ID: 4G1C

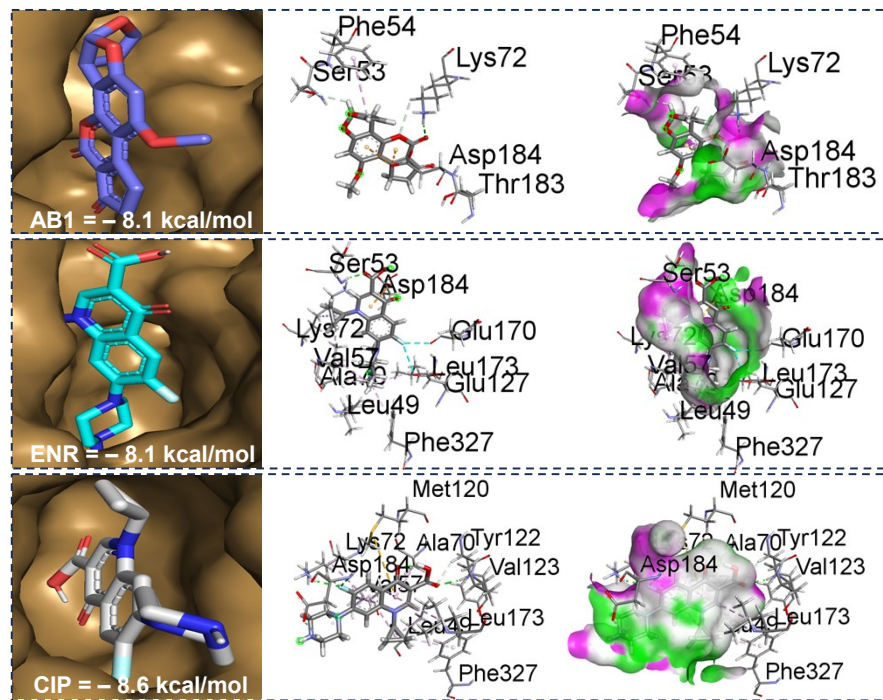

(c) PDB ID: 3P0M

**Fig. S7** Superimposed docked conformers selected analogs within the active site of the receptor protein, nonbonding interactions, and hydrogen bond surface area of selected toxic compounds with receptor protein (a) 2RJQ, (b) 4G1C, and (c) 3P0M receptor proteins.

**Table S6** Average binding affinities and nonbonding interactions of all compounds after molecular docking with receptor proteins 2RJQ, 4G1C, 3P0M.

| Compounds | Residues in contact |         |         | Interaction type |      |      | Distance (Å) |      |      |
|-----------|---------------------|---------|---------|------------------|------|------|--------------|------|------|
|           | 2RJQ                | 4G1C    | 3P0M    | 2RJQ             | 4G1C | 3P0M | 2RJQ         | 4G1C | 3P0M |
| ZER       | LEU 443             | SER 251 | SER 53  | H                | H    | H    | 1.99         | 2.48 | 2.69 |
|           | HIS 414             | PHE 70  | LYS 72  | CHB              | PPS  | H    | 3.07         | 5.06 | 2.45 |
|           | ILE 442             | ILE 142 | LYS 72  | CHB              | A    | CHB  | 2.51         | 4.42 | 2.54 |
|           | HIS 420             | PHE 70  | ASP 184 | PC               | PA   | Pa   | 4.46         | 5.47 | 4.02 |
|           | HIS 420             | HIS 158 | LEU 74  | PPT              | PA   | A    | 5.33         | 5.27 | 5.38 |
|           | --                  | ALA 59  | PHE 54  | --               | PA   | PA   | --           | 4.82 | 4.43 |
|           | --                  | VAL 254 | --      | --               | PA   | --   | --           | 5.24 |      |
| AB1       | ARG 300             | ASN 275 | LYS 72  | CHB              | H    | H    | 2.64         | 2.28 | 2.18 |
|           | ALA 448             | ARG 71  | LYS 72  | A                | A    | CHB  | 4.34         | 3.84 | 3.09 |
|           | ILE 297             | CYS 293 | THR 183 | A                | A    | CHB  | 4.25         | 3.60 | 2.92 |
|           | PRO 487             | ALA 63  | SER 53  | A                | PA   | CHB  | 4.22         | 3.62 | 2.84 |
|           | HIS 304             | ALA 63  | ASP 184 | PA               | PA   | Pa   | 5.41         | 4.91 | 3.40 |
|           | ALA 448             | --      | PHE 54  | PA               | --   | PA   | 5.02         | --   | 4.59 |
|           | ARG 300             | --      | --      | PA               | --   | --   | 4.88         | --   | --   |
|           | LEU 301             | --      | --      | PA               | --   | --   | 5.36         | --   | --   |
| CIP       | LEU 443             | GLY 249 | LYS 72  | H                | H    | H    | 1.92         | 3.01 | 2.19 |
|           | THR 378             | CYS 293 | VAL 123 | CHB              | H    | H    | 2.47         | 2.63 | 2.07 |
|           | ILE 442             | GLY 291 | ASP 184 | CHB              | H    | H    | 2.87         | 2.50 | 2.85 |
|           | GLY 380             | GLY 249 | TYR 122 | CHB              | CHB  | CHB  | 2.78         | 2.51 | 2.62 |

|     |         |         |         |     |     |     |      |      |      |
|-----|---------|---------|---------|-----|-----|-----|------|------|------|
|     | GLU 411 | PRO 292 | ASP 184 | CHB | CHB | CHB | 2.53 | 2.72 | 2.48 |
|     | LEU 443 | ARG 71  | VAL 57  | A   | A   | PS  | 4.75 | 4.67 | 2.72 |
|     | HIS 410 | ALA 63  | MET 120 | PA  | PA  | Ps  | 3.74 | 3.78 | 5.82 |
|     | HIS 414 | ALA 63  | VAL 57  | PA  | PA  | A   | 5.05 | 4.52 | 4.84 |
|     | LEU 379 | --      | LEU 49  | PA  | --  | A   | 5.30 | --   | 5.27 |
|     | --      | --      | PHE 327 | --  | --  | PA  | --   | --   | 5.47 |
|     | --      | --      | LYS 72  | --  | --  | PA  | --   | --   | 5.37 |
|     | --      | --      | ALA 70  | --  | --  | PA  | --   | --   | 4.42 |
|     | --      | --      | LEU 173 | --  | --  | PA  | --   | --   | 5.08 |
|     | LEU 443 | GLY 249 | SER 53  | H   | H   | H   | 1.94 | 2.97 | 2.14 |
|     | ASP 377 | CYS 293 | GLU 127 | H   | H   | F   | 2.47 | 2.58 | 3.32 |
|     | THR 378 | GLY 249 | GLU 170 | CHB | CHB | F   | 2.53 | 2.50 | 2.97 |
|     | GLY 380 | PRO 292 | ASP 184 | CHB | CHB | Pa  | 2.88 | 2.58 | 3.74 |
|     | GLU 411 | ARG 71  | VAL 57  | CHB | CHB | A   | 2.66 | 3.06 | 3.93 |
| ENR | ALA 382 | ARG 71  | ALA 70  | CHB | A   | A   | 2.14 | 5.19 | 4.48 |
|     | LEU 443 | ALA 73  | LYS 72  | A   | A   | A   | 4.66 | 3.93 | 4.45 |
|     | HIS 410 | ALA 63  | LEU 49  | PA  | PA  | A   | 3.79 | 3.70 | 4.12 |
|     | HIS 414 | ALA 63  | VAL 57  | PA  | PA  | A   | 4.88 | 4.48 | 4.93 |
|     | HIS 420 | --      | LEU 173 | PA  | --  | A   | 4.76 | --   | 4.87 |
|     | LEU 379 | --      | PHE 327 | PA  | --  | PA  | 5.26 | --   | 4.66 |
|     | GLY 380 | PHE 70  | LYS 72  | H   | H   | H   | 2.63 | 2.91 | 3.06 |
|     | CYS 371 | ILE 142 | LYS 168 | H   | H   | H   | 2.89 | 2.73 | 2.35 |
| OXY | THR 378 | SER 251 | THR 51  | CHB | H   | H   | 2.90 | 2.87 | 1.76 |
|     | HIS 373 | GLN 140 | ASP 184 | CHB | H   | H   | 2.75 | 2.05 | 2.36 |
|     | ALA 335 | THR 69  | GLU 127 | PA  | CHB | H   | 5.08 | 2.41 | 2.83 |

|     |         |         |         |     |     |     |      |      |      |
|-----|---------|---------|---------|-----|-----|-----|------|------|------|
|     | --      | ARG 105 | LYS 168 | --  | PC  | CHB | --   | 3.43 | 5.59 |
|     | --      | ALA 59  | ASN 171 | --  | PA  | CHB | --   | 4.83 | 2.43 |
|     | --      | ILE 142 | THR 51  | --  | PA  | CHB | --   | 5.04 | 2.70 |
|     | --      | --      | VAL 57  | --  |     | PS  | --   | --   | 2.92 |
|     | LEU 379 | ARG 105 | PHE 54  | H   | H   | H   | 1.94 | 2.05 | 2.58 |
|     | LEU 443 | ILE 142 | GLY 55  | H   | H   | H   | 2.26 | 2.09 | 2.47 |
|     | SER 441 | ALA 59  | GLY 50  | H   | CHB | CHB | 2.58 | 2.68 | 2.30 |
|     | GLY 380 | ASN 141 | THR 183 | H   | CHB | CHB | 2.06 | 2.80 | 2.61 |
|     | ASP 377 | ARG 105 | ASP 184 | CHB | CHB | Pa  | 2.80 | 2.52 | 4.09 |
|     | ASP 377 | PHE 223 | VAL 57  | Pa  | PS  | A   | 3.18 | 2.74 | 3.94 |
| OTA | HIS 410 | PHE 70  | LEU 173 | PPS | PPS | A   | 3.71 | 5.41 | 5.28 |
|     | ILE 442 | HIS 158 | LEU 49  | A   | PPS | A   | 4.71 | 5.55 | 4.66 |
|     | ILE 442 | VAL 254 | LYS 72  | PA  | A   | A   | 3.91 | 4.67 | 4.91 |
|     | LEU 443 | PHE 223 | MET 120 | PA  | PA  | A   | 4.49 | 4.40 | 4.89 |
|     | --      | ILE 142 | PHE 327 | --  | PA  | PA  | --   | 5.39 | 5.03 |
|     | --      | VAL 67  | VAL 57  | --  | PA  | PA  | --   | 4.39 | 4.48 |
|     | --      | PRO 68  | --      | --  | PA  | --  | --   | 5.46 | --   |
|     | --      | ARG 105 | --      | --  | PA  | --  | --   | 4.01 | --   |

H = conventional hydrogen bond, CHB = carbon hydrogen bond, PC =  $\pi$  cation, PPT =  $\pi$ - $\pi$  T-shaped, A = alkyl, PA =  $\pi$ -alkyl, Pa =  $\pi$ -anion, PPS =  $\pi$ - $\pi$  stacked, PHB =  $\pi$ -donor hydrogen bond, PS =  $\pi$ -sigma, Ps =  $\pi$ -sulfur, F = Fluorine.

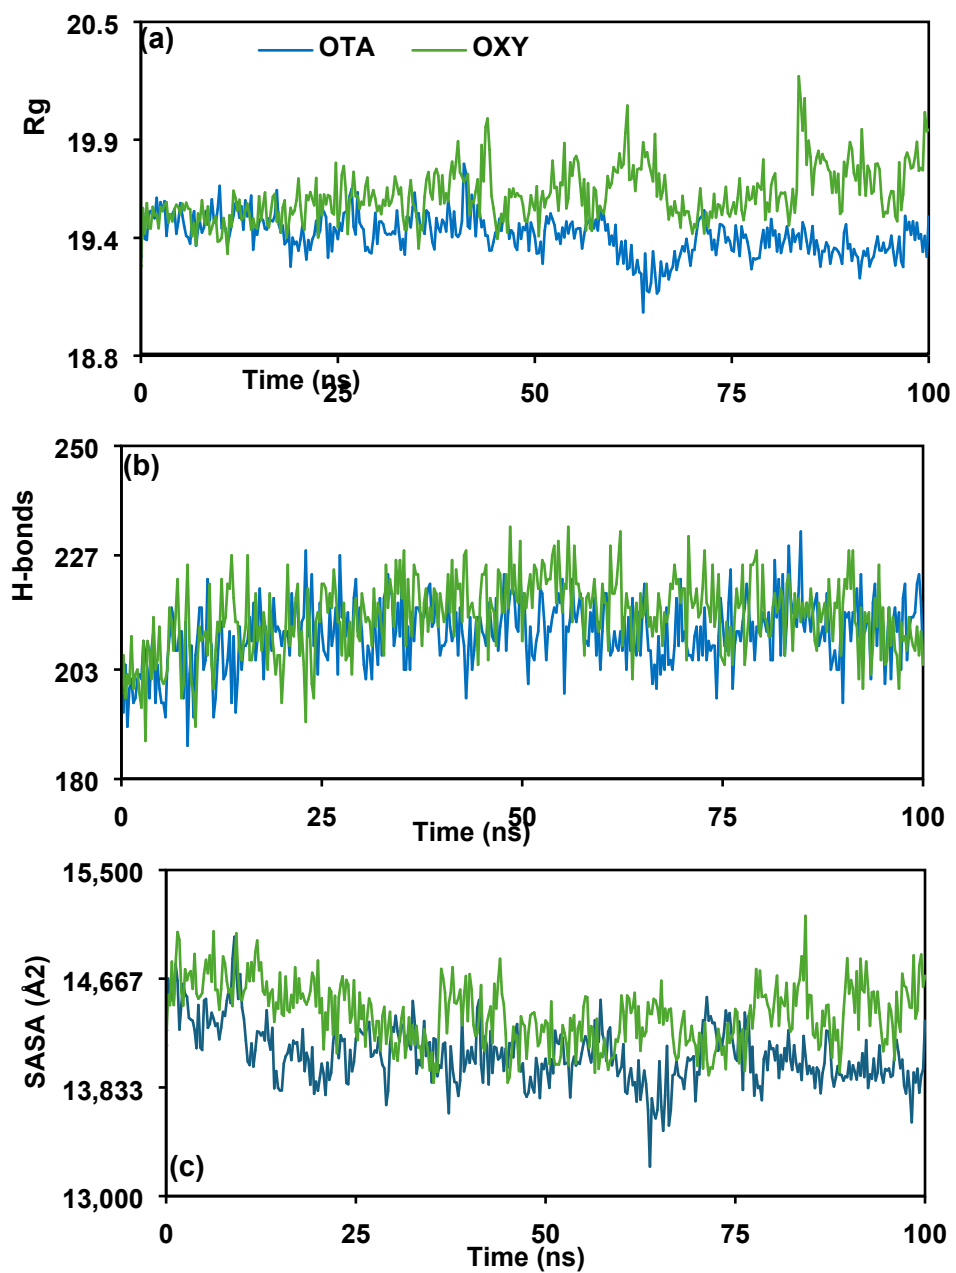

**Fig. S8** (a) Rg, (b) H-bonds, and (c) SASA of the selected complexes during 100 ns MD simulation within the 2RJQ protein.

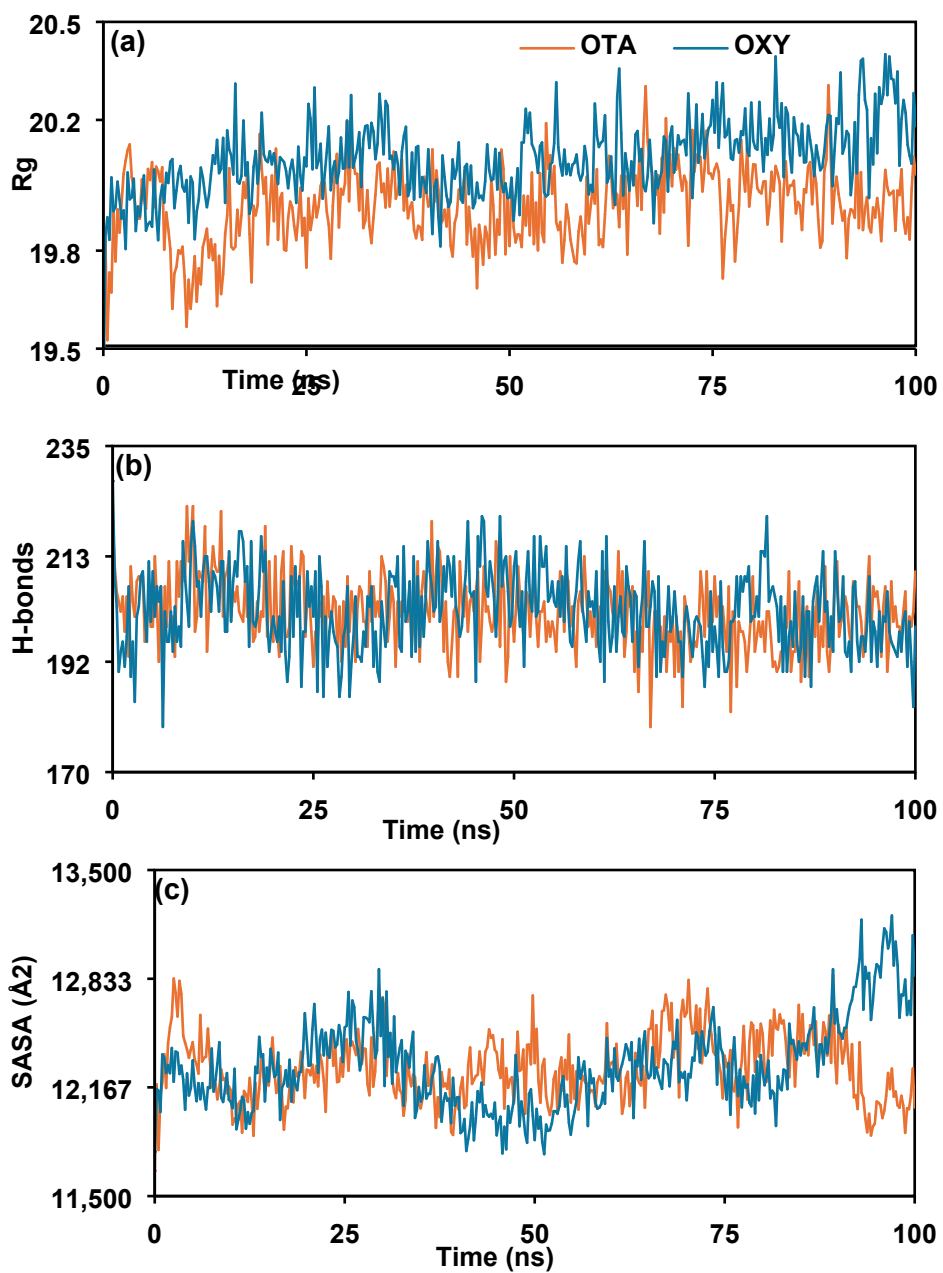

**Fig. S9** (a) Rg, (b) H-bonds, and (c) SASA of the selected complexes during 100 ns MD simulation within the 4G1C protein.

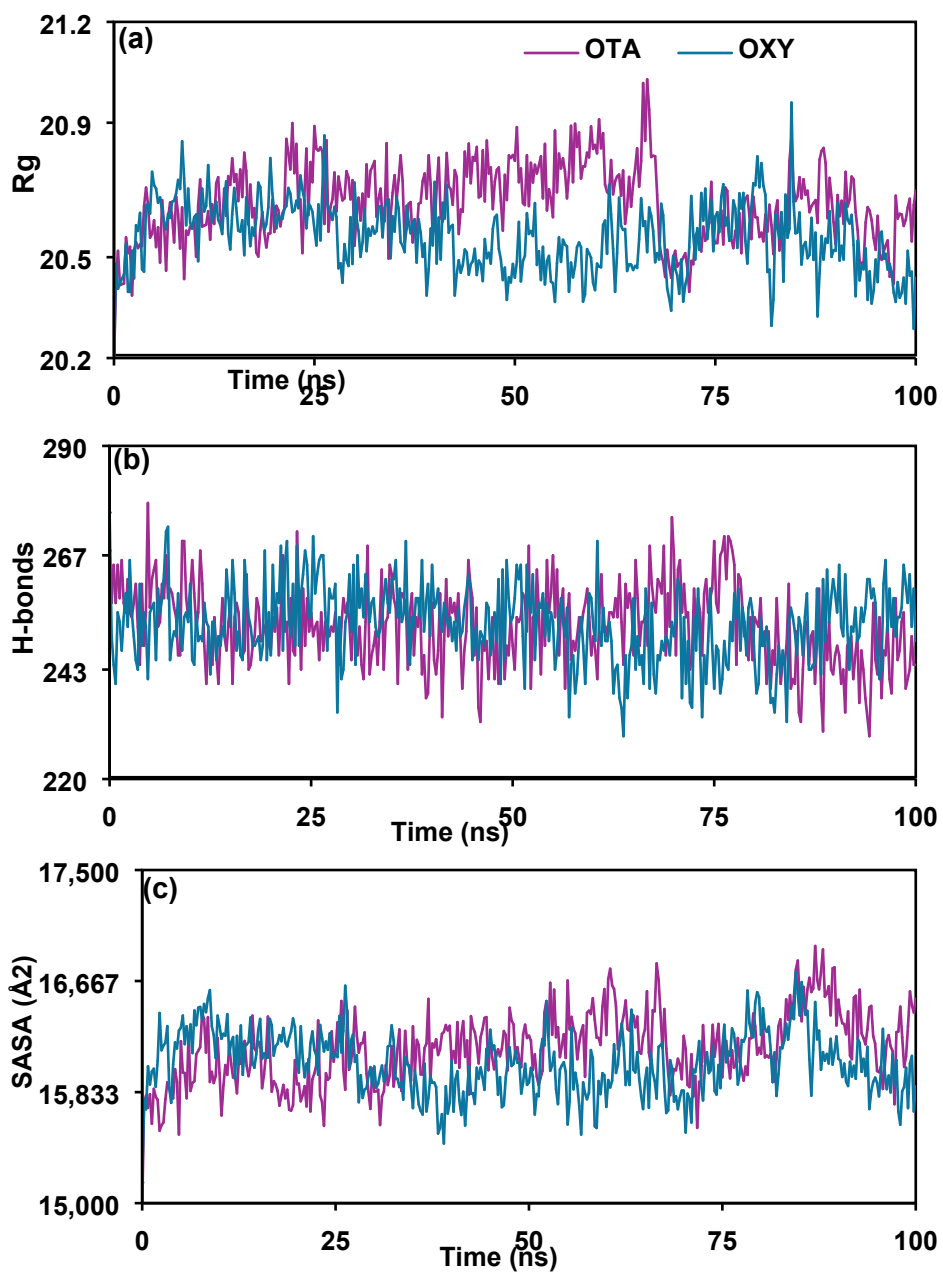

**Fig. S10** (a) Rg, (b) H-bonds, and (c) SASA of the selected complexes during 100 ns MD simulation within the 3POM protein.

**Table S7.** Quantitative structure-activity relationship study of toxic compounds.

| Compound<br>s | Chiv<br>5 | bcutm<br>1 | MRVSA<br>9 | MRVSA<br>6 | PEOEVSA<br>5 | GATSV<br>4 | J        | Diameter<br>t | pIC <sub>50</sub> |
|---------------|-----------|------------|------------|------------|--------------|------------|----------|---------------|-------------------|
| ZER           | 1.6       | 3.91       | 17.82      | 29.33      | 12.15        | 1.11       | 2.0<br>1 | 10            | 4.35              |
| AB1           | 2.53      | 4.15       | 16.75      | 45.51      | 0            | 0.9        | 1.5      | 9             | 4.61              |
| CIP           | 2.41      | 4.13       | 22.56      | 39.93      | 0            | 0.76       | 1.5<br>3 | 11            | 4.64              |
| ENR           | 2.66      | 4.13       | 22.56      | 39.93      | 6.92         | 0.78       | 1.4<br>8 | 13            | 4.87              |
| OXY           | 4.19      | 4.05       | 17.47      | 51.99      | 12.13        | 1.07       | 1.8<br>7 | 11            | 4.92              |
| OTA           | 2.4       | 4.03       | 29.44      | 63.67      | 41.93        | 1.07       | 1.6<br>3 | 14            | 4.75              |

A multiple linear regression (MLR) equation was used to calculate the pIC<sub>50</sub> values. The following formula is as follows:

$$\text{pIC}_{50}(\text{Activity}) = -2.77 + 0.14 \times \text{Chiv5} + 1.60 \times \text{bcutm1} + 0.02 \times \text{MRVSA9} + (-0.003) \times \text{MRVSA6} + 0.007 \times \text{PEOEVSA5} + -0.16 \times \text{GATSV4} + 0.21 \times \text{J} + 0.08 \times \text{Diameter}.$$

Note for **Table S7**:

**Chiv5:** A molecular descriptor representing the Chi molecular shape index, which measures the complexity of a molecule's shape in relation to the distribution of atoms. It provides insight into molecular flexibility or rigidity, which can influence bioactivity and molecular interactions.

**bcutm1:** A descriptor based on the BCUT (Biological Coarse-grained Unit Tensor) method, which quantifies molecular properties related to the graph structure of a molecule. It reflects symmetry and compactness, which are important for understanding molecular behavior and interactions.

**MRVSA9:** Molecular Refractivity and Volume Surface Area descriptor, which measures the volume and surface area of a molecule. It is often used to evaluate how the size and shape of a molecule affect its bioavailability and interaction with biological targets.

**MRVSA6:** Another MRVSA index that is based on the surface area of a molecule. This descriptor helps assess how molecular size, shape, and surface area influence the compound's potential for interaction with receptors or biomolecules, which is critical for drug design.

**PEOEVS<sub>A5</sub>:** Partial Electrostatic Surface Area (PEOEVS<sub>A</sub>) descriptor, representing the distribution of electrostatic potential across the molecule's surface. It helps in evaluating the molecule's polarity and its potential to interact with biological receptors, providing insights into solubility and bioactivity.

**GATS<sub>v4</sub>:** Geary's Autocorrelation of the lagged molecular property (v<sub>4</sub>) descriptor, which measures the spatial distribution of molecular properties (like charge or dipole moment) across the entire molecule. It helps us understand how different parts of a molecule interact spatially, which is crucial for predicting biological activity.

**J:** The Jaccard Similarity Coefficient. This measures the similarity between two sets (in this case, molecular descriptors). It is used to compare molecules and evaluate their structural similarities, often applied in virtual screening or similarity-based drug design.

**Diameter:** Refers to the diameter of the molecule, which is the largest distance between any two atoms in the molecule. This descriptor is a measure of the molecule's size and compactness, which is important in understanding how a molecule fits into binding sites and interacts with receptors.

**pIC<sub>50</sub>:** The negative logarithm of the IC<sub>50</sub> value (in mol/L), where IC<sub>50</sub> represents the concentration of a compound required to inhibit 50% of a biological activity. A higher pIC<sub>50</sub> value indicates greater potency and is used as an indicator of the compound's effectiveness in inhibiting a specific biological function <sup>4</sup>.

## References

- 1 R. Krivák and D. Hoksza, Predicting protein-ligand binding sites using deep convolutional neural networks, *J Cheminform.*, 2018, **10**, 1–12.
- 2 Z. Amiri, M. Bayat and D. Gheidari, Synthesis of thiazoloquinolinone derivatives: molecular docking, MD simulation, and pharmacological evaluation as VEGFR-2 inhibitors, *BMC Chem*, 2025, **19**, 1–24.
- 3 O. V. Sobolev, P. V. Afonine, N. W. Moriarty, M. L. Hekkelman, R. P. Joosten, A. Perrakis and P. D. Adams, Synthesis of thiazoloquinolinone derivatives: molecular docking, MD simulation, and pharmacological evaluation as VEGFR-2 inhibitors, *Structure*, 2020, **28**, 1249-1258.e2.
- 4 M. O. Farque, R. M. Islam, M. F. Rahman Joni, M. Akter, S. Akter, M. D. Islam, M. J. Bin Salim, A. A. Aziz, E. Kabir and M. Uzzaman, Structural modification of Naproxen; physicochemical, spectral, medicinal, and pharmacological evaluation, *Inform. Med. Unlocked*, 2025, **53**, 101617.
